# Supplementary material for: Potential social marketing applications for knowledge translation in healthcare: a scoping review protocol
Source: PubMed Central journal article supplement — BMJ Open. 2023 Jun 30;13(6):e071901. doi: 10.1136/bmjopen-2023-071901 (PMC10314579; doi:10.1136/bmjopen-2023-071901), 2023-06-30
Supplement: bmjopen-2023-071901supp001.pdf [file bmjopen-2023-071901supp001.pdf]

| <b>Supplemental file 1: OVID-MEDLINE search strategy and search terms</b> |                                                                                                                                                       |
|---------------------------------------------------------------------------|-------------------------------------------------------------------------------------------------------------------------------------------------------|
| 1                                                                         | Social marketing.ti,kf.                                                                                                                               |
| 2                                                                         | marketing.ti,kf.                                                                                                                                      |
| 3                                                                         | ((Social marketing or marketing) adj5 behavior*).ti,ab.                                                                                               |
| 4                                                                         | ((Social marketing or marketing) adj5 behavior change*).ti,ab.                                                                                        |
| 5                                                                         | ((Social marketing or marketing) adj5 campaign*).ti,ab.                                                                                               |
| 6                                                                         | ((Social marketing or marketing) adj5 communication*).ti,ab.                                                                                          |
| 7                                                                         | ((Social marketing or marketing) adj5 (customer* or consumer)).ti,ab.                                                                                 |
| 8                                                                         | ((Social marketing or marketing) adj5 promotion*).ti,ab.                                                                                              |
| 9                                                                         | ((Social marketing or marketing) adj5 health*).ti,ab.                                                                                                 |
| 10                                                                        | ((Social marketing or marketing) adj5 knowledge translation*).ti,ab.                                                                                  |
| 11                                                                        | ((social marketing or marketing) adj5 (intervention* or strategy* or effect* or effectiveness or impact* or success* or improve* or failure*)).ti,ab. |
| 12                                                                        | randomized controlled trial.pt.                                                                                                                       |
| 13                                                                        | controlled clinical trial.pt.                                                                                                                         |
| 14                                                                        | randomized.ab.                                                                                                                                        |
| 15                                                                        | randomly.ab.                                                                                                                                          |
| 16                                                                        | trial.ab.                                                                                                                                             |
| 17                                                                        | Quasi experimental.ti,ab.                                                                                                                             |
| 18                                                                        | 1 or 2 or 3 or 4 or 5 or 6 or 7 or 8 or 9 or 10 or 11                                                                                                 |
| 19                                                                        | 12 or 13 or 14 or 15 or 16 or 17                                                                                                                      |
| 20                                                                        | 18 and 19                                                                                                                                             |
| 21                                                                        | limit 20 to English language                                                                                                                          |
| 22                                                                        | limit 21 to human                                                                                                                                     |
| 23                                                                        | limit 22 to yr="1971 -Current"                                                                                                                        |
